# Supplementary material for: Size effects of graphene nanoplatelets on the properties of high-density polyethylene nanocomposites: morphological, thermal, electrical, and mechanical characterization
Source: PubMed Central journal article supplement (PMC7006480; doi:10.3762/bjnano.11.14), 2020-01-14
Supplement: Beilstein_J_Nanotechnol-11-167-s001.pdf [file Beilstein_J_Nanotechnol-11-167-s001.pdf]

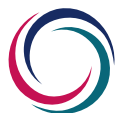

## Supporting Information

for

### **Size effects of graphene nanoplatelets on the properties of high-density polyethylene nanocomposites: morphological, thermal, electrical, and mechanical characterization**

Tuba Evgin, Alpaslan Turgut, Georges Hamaoui, Zdenko Spitalsky, Nicolas Horny, Matej Micusik, Mihai Chirtoc, Mehmet Sarikanat and Maria Omastova

*Beilstein J. Nanotechnol.* **2020**, *11*, 167–179. [doi:10.3762/bjnano.11.14](https://doi.org/10.3762/bjnano.11.14)

### **FTIR spectroscopy and XRD patterns of HDPE/GnP nanocomposites with various concentrations of GnPs**

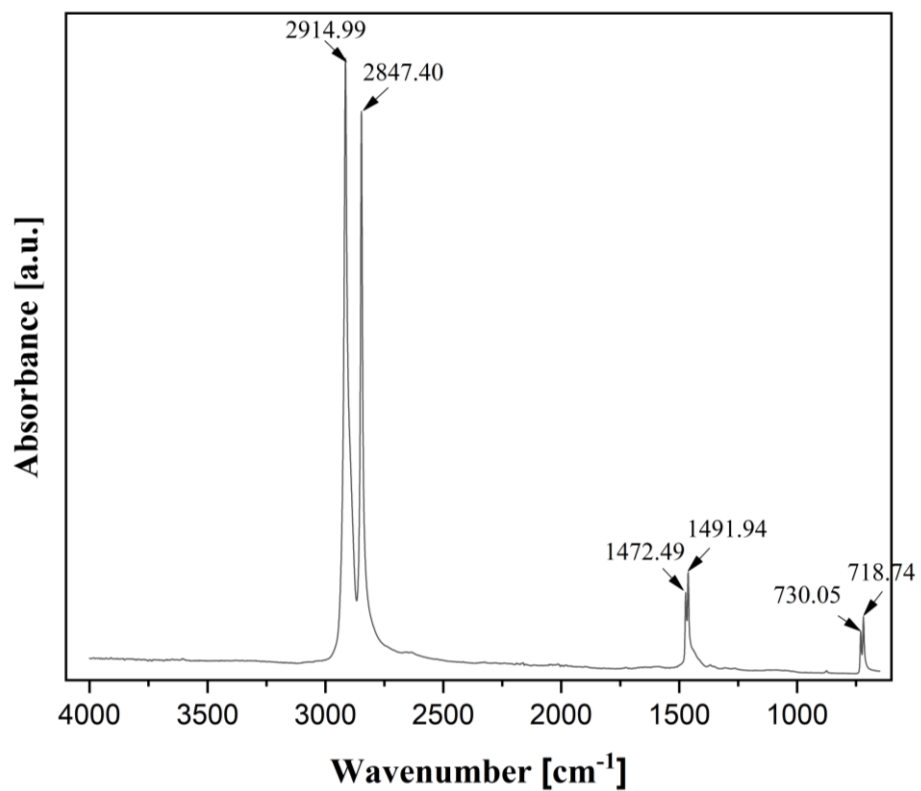

**Figure S1:** FTIR spectroscopy of HDPE.

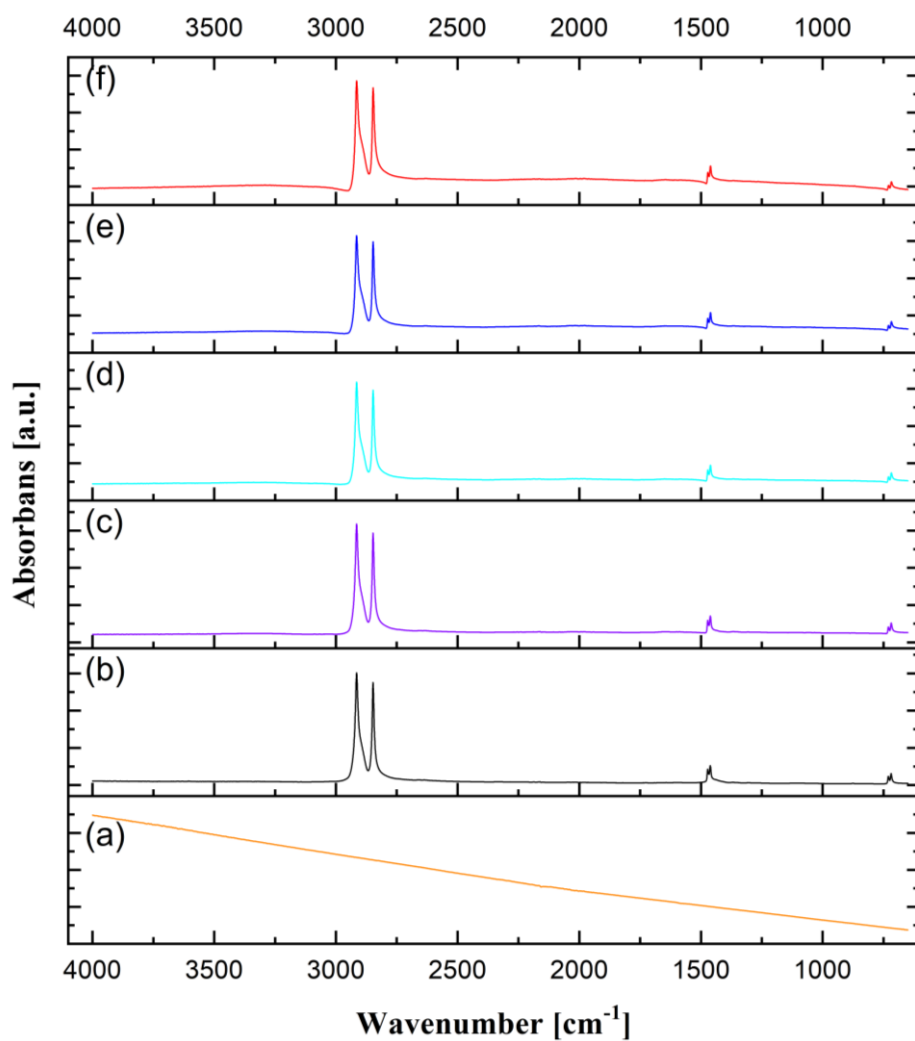

**Figure S2:** FTIR spectroscopy of a) G1, b) HDPE, c) HDPE/1.84 vol % G1, d) HDPE/5.52 vol % G1, e) HDPE/9.24 vol % G1, and f) HDPE/13.92 vol % G1 nanocomposite.

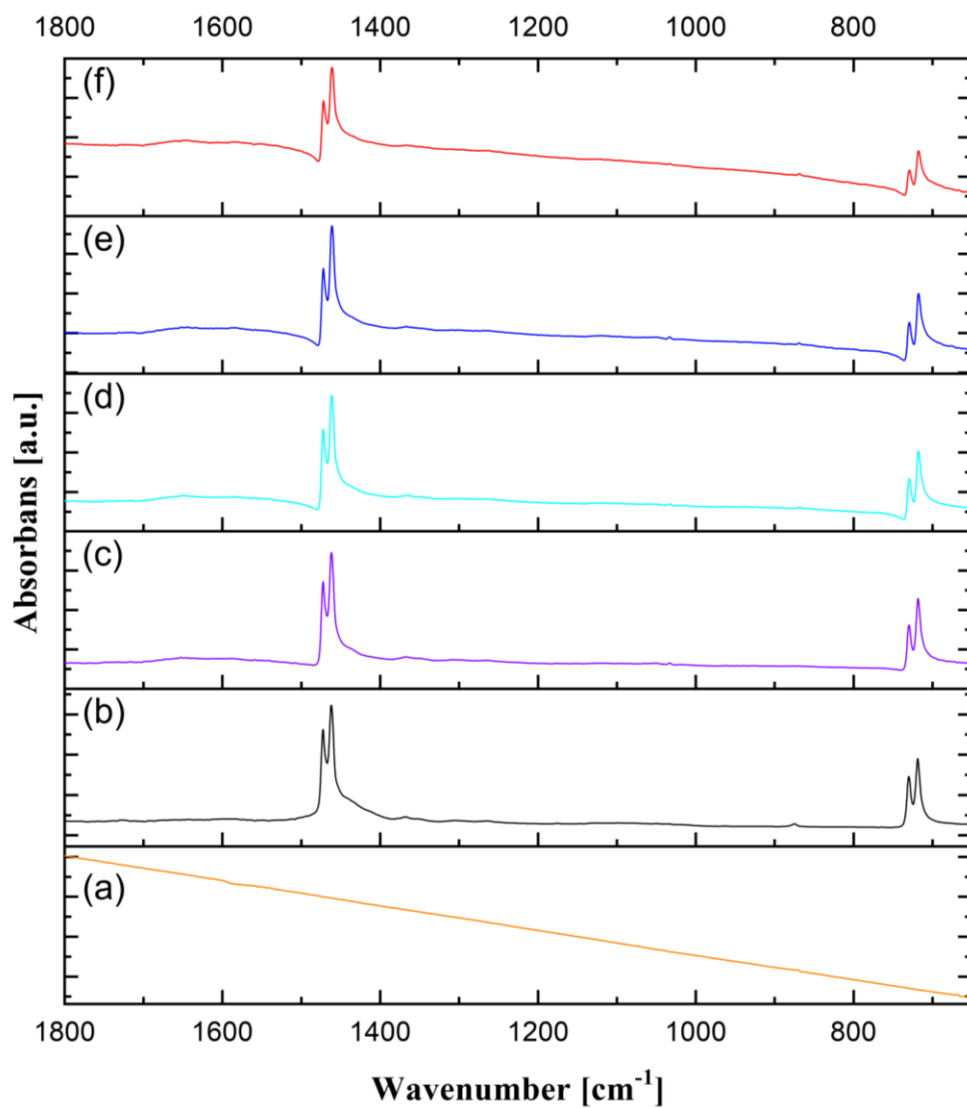

**Figure S3:** FTIR spectroscopy of a) G1, b) HDPE, c) HDPE/1.84 vol % G1, d) HDPE/5.52 vol % G1, e) HDPE/9.24 vol % G1, and f) HDPE/13.92 vol % G1 nanocomposite in the range of 650–1800 cm<sup>-1</sup>.

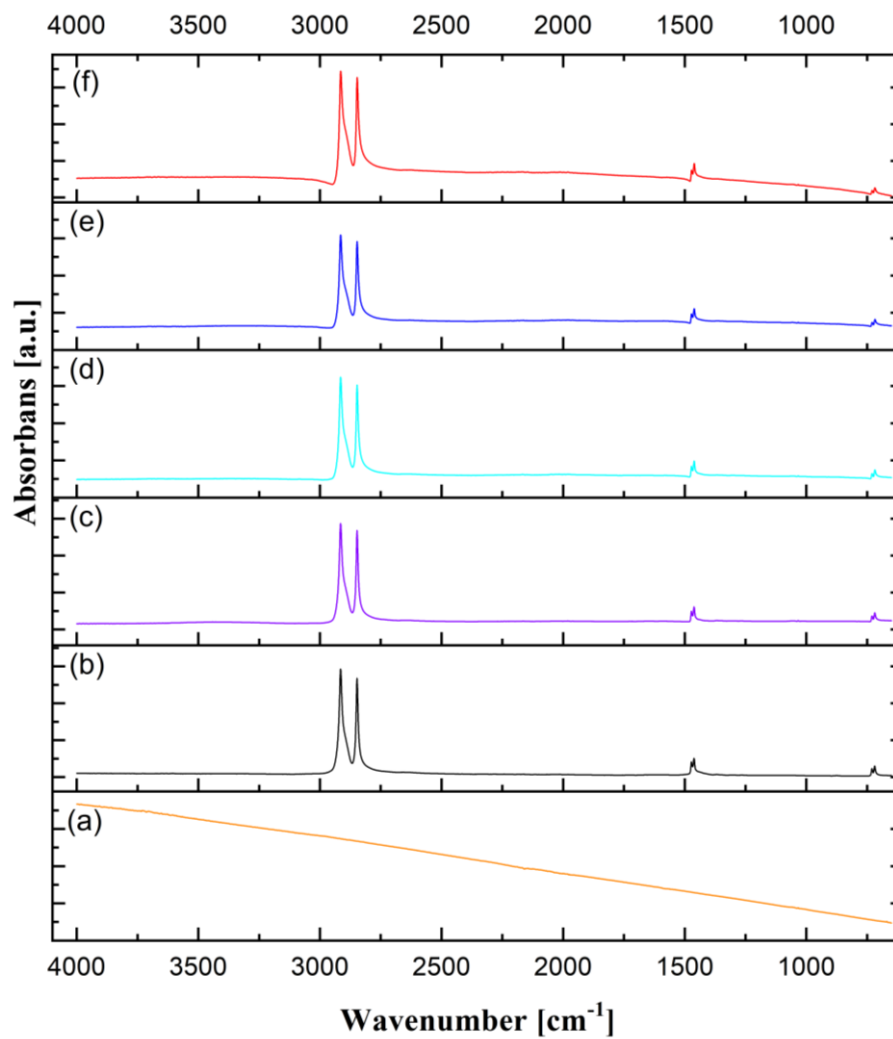

**Figure S4:** FTIR spectroscopy of a) G2, b) HDPE, c) HDPE/1.84 vol % G2, d) HDPE/5.52 vol % G2, e) HDPE/9.24 vol % G2, and f) HDPE/13.92 vol % G2 nanocomposite.

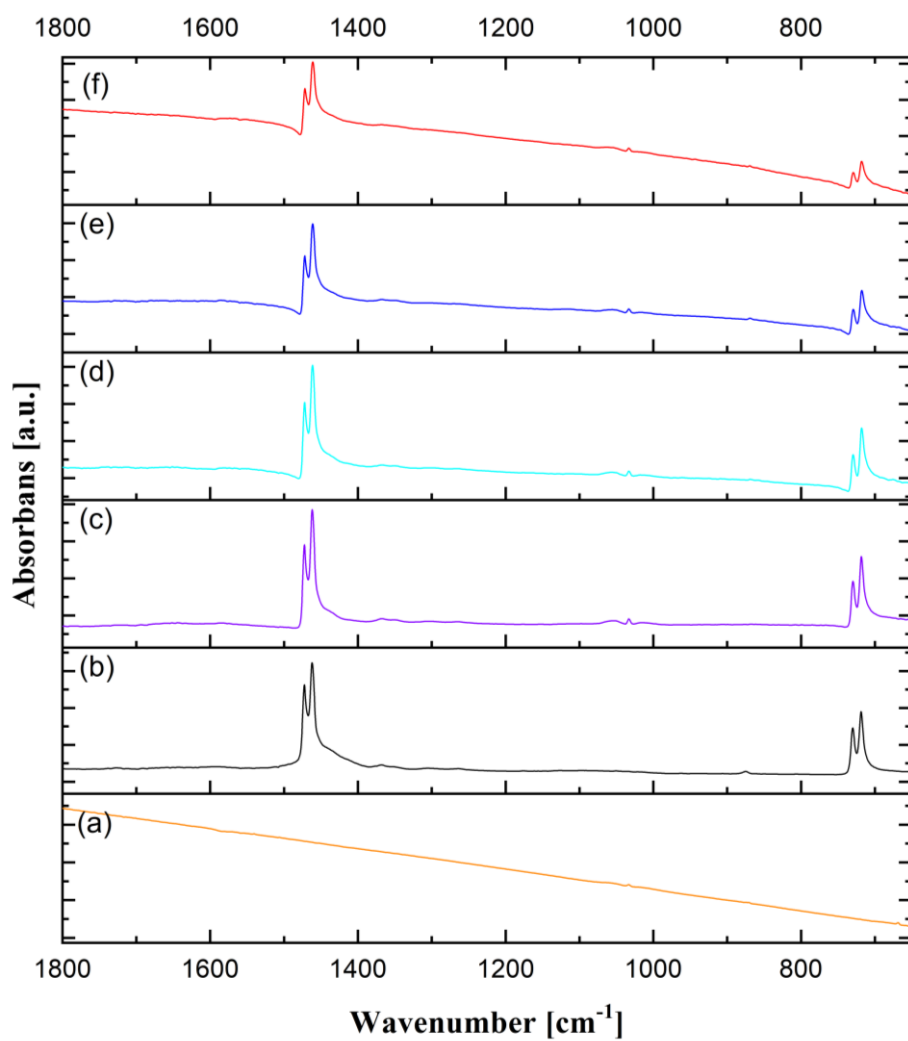

**Figure S5:** FTIR spectroscopy of a) G2, b) HDPE, c) HDPE/1.84 vol % G2, d) HDPE/5.52 vol % G2, e) HDPE/9.24 vol % G2, and f) HDPE/13.92 vol % G2 nanocomposite in the range of 650–1800 cm<sup>-1</sup>.

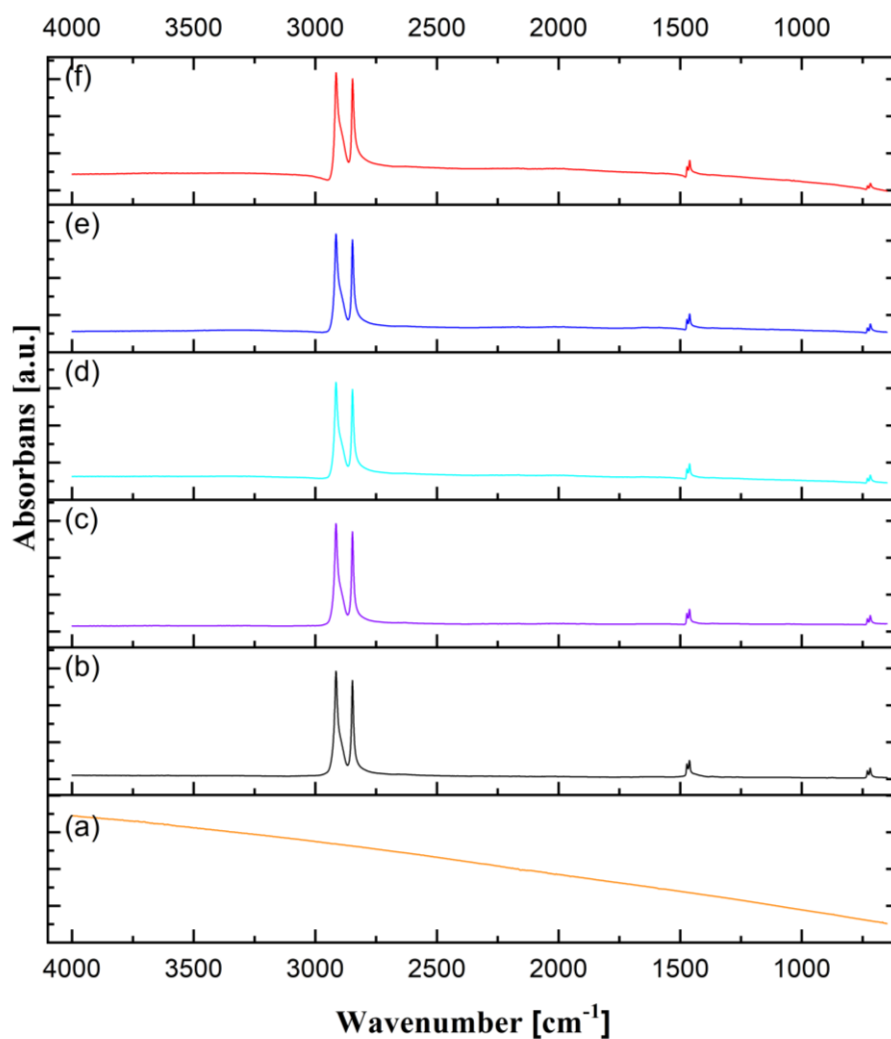

**Figure S6:** FTIR spectroscopy of a) G3, b) HDPE, c) HDPE/1.84 vol % G3, d) HDPE/5.52 vol % G3, e) HDPE/9.24 vol % G3, and f) HDPE/13.92 vol % G3 nanocomposite.

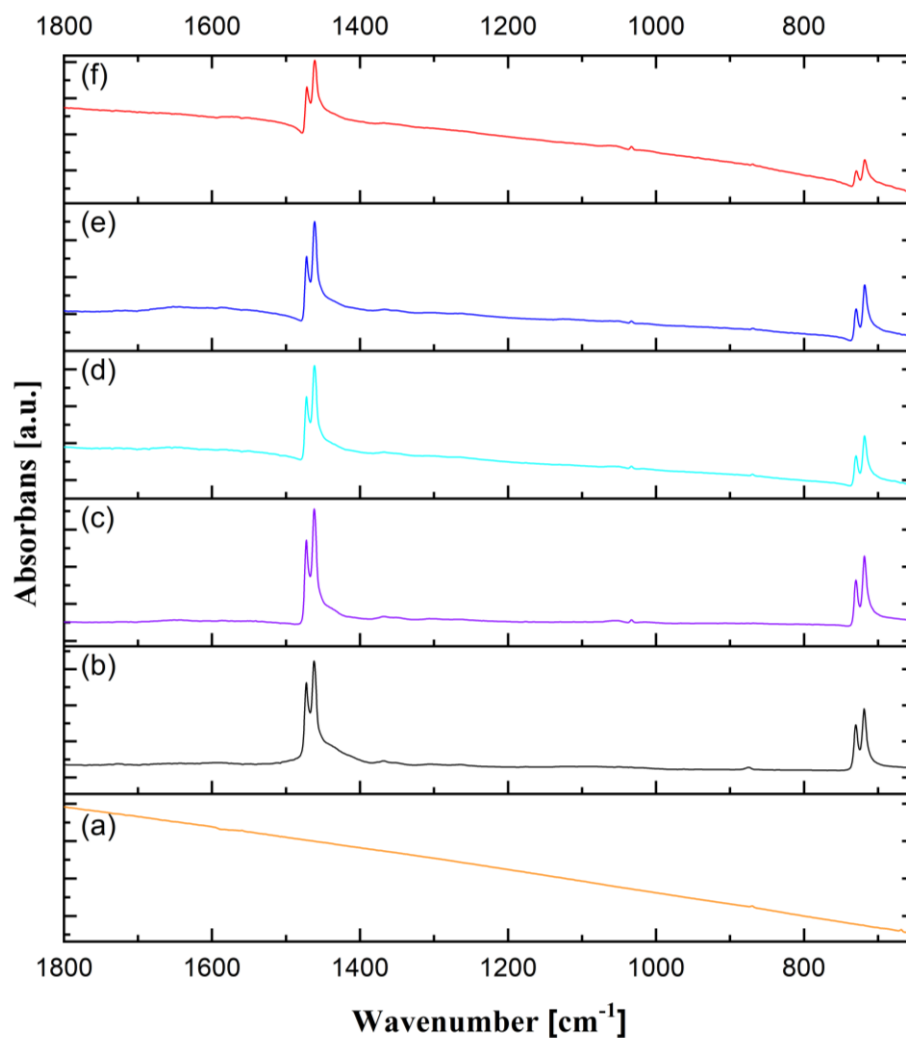

**Figure S7:** FTIR spectroscopy of a) G3, b) HDPE, c) HDPE/1.84 vol % G3, d) HDPE/5.52 vol % G3, e) HDPE/9.24 vol % G3, and f) HDPE/13.92 vol % G3 nanocomposite in the range of 650–1800 cm<sup>-1</sup>.



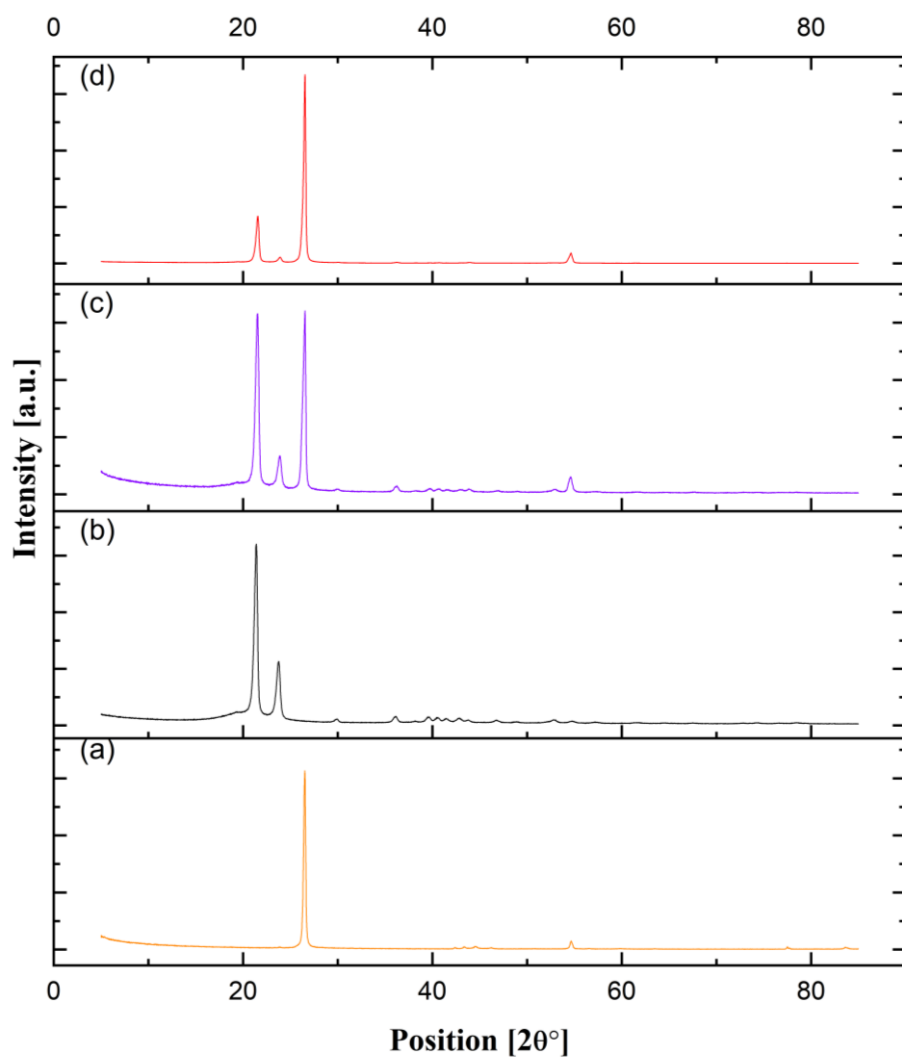

**Figure S8:** XRD pattern of a) G1, b) HDPE, c) HDPE/1.84 vol % G1, d) HDPE/13.92 vol % G1 nanocomposite.

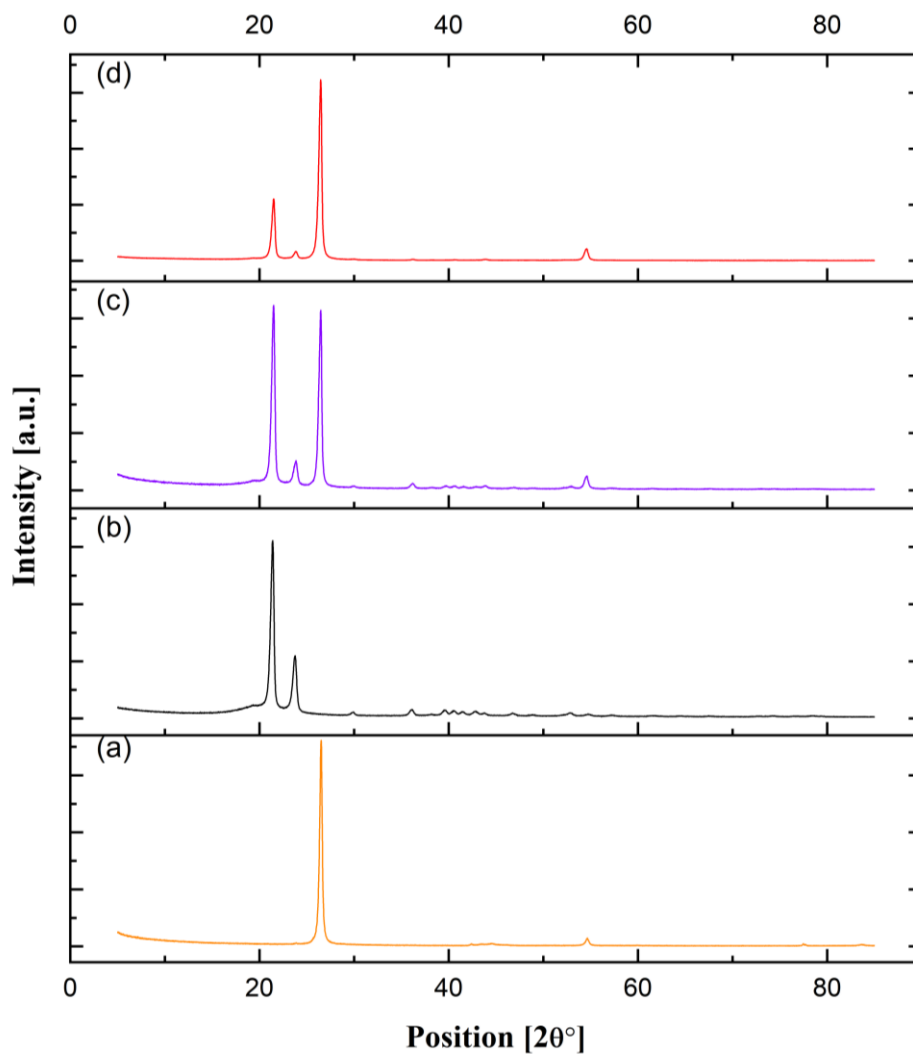

**Figure S9:** XRD pattern of a) G2, b) HDPE, c) HDPE/1.84 vol % G2, d) HDPE/13.92 vol % G2 nanocomposite.

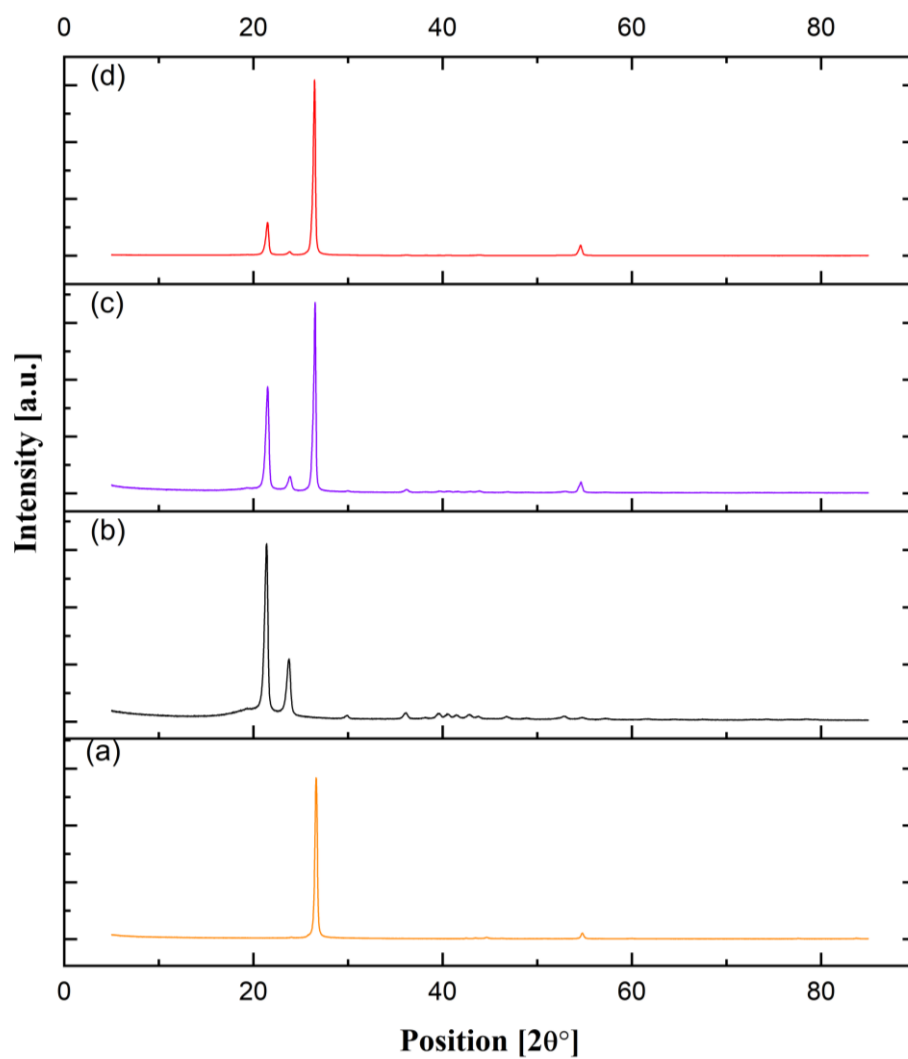

**Figure S10:** XRD pattern of a) G3, b) HDPE, c) HDPE/1.84 vol % G3, d) HDPE/13.92 vol % G3 nanocomposite.
